# Supplementary material
Source: Springer Nature journal article supplement (https://www.springermedizin.de/resource/supplementary/12985_2013_2312_MOESM12_ESM.pdf/9606310)

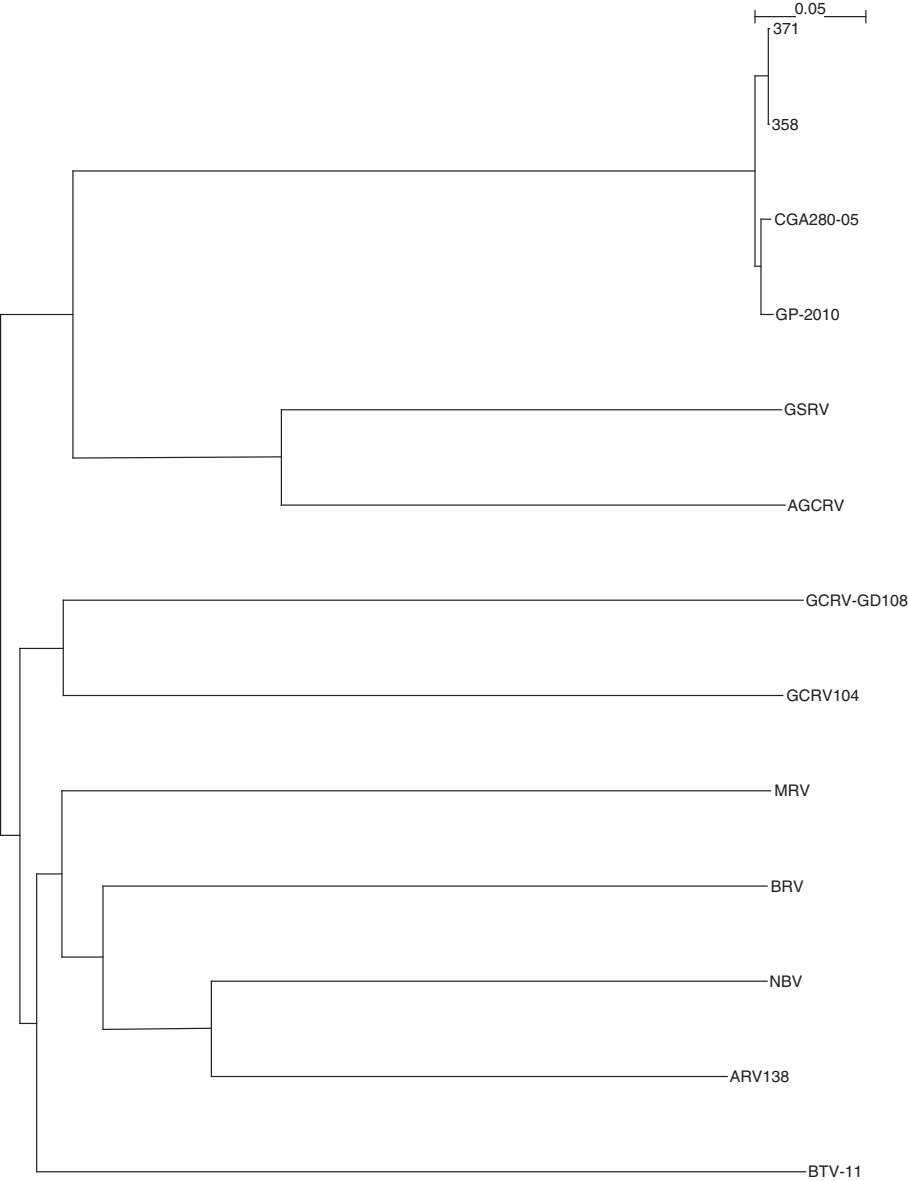

Supplement: MOESM12 [file 9606310]
